# Supplementary material
Source: publisher figshare collection journal article supplement (https://tandf.figshare.com/ndownloader/files/16261433)
Supplement: Supplementary file 1 [file 16261433]

## SUPPLEMENTARY MATERIAL: COMPLEMENTARY VARIABLES ANALYSIS

For each experiment, a qualitative analysis of the influence of complementary variables was conducted.

### I. EXPERIMENT 1

#### A. Identification of type of jaw movement (B, C, CB) for each animal species separately (2 models, one per animal species)

The CB sound had a longer  $D$  than other types of jaw movement in both ruminant species ( $P \leq 0.001$ ). Whereas duration of B and C did not differ significantly for sheep, in cows B events were shorter than C events (Table A1). In all jaw movements the  $FSP$  where the peak occurs was similar in cows ( $P = 0.123$ ), but in sheep the peak of C was detected in a frequency band significantly higher ( $P \leq 0.001$ ) than B and CB. The C events presented the lowest  $TE$  values in sheep ( $P \leq 0.001$ ), whereas the opposite was observed in cows, where C showed the highest values ( $P \leq 0.001$ ). While in cows C showed the highest  $MPA$ , in sheep there were no significant differences ( $P = 0.06$ ) between three types of jaw movements. In both sheep and cows,  $D$  was the only variable selected in all the partitions for discriminant analysis using  $EB$  with  $C_V$  model. The  $MPA$  was important in cows, participating in all cases, but was not the same in sheep. The  $FSP$  was selected in half of the sheep partitions but never in cows. The  $TE$  was never selected as a meaningful variable.

### II. EXPERIMENT 2

#### A. Comparison of types of jaw movements within plant species

Except for alfalfa, B events were the shortest and CB the longest ( $P \leq 0.001$ , Table A2). Bites produced the peak energy at a lower  $FSP$  frequency ( $P = 0.023$ ) than C and CB. There were no significant differences in  $TE$  ( $P = 0.137$ ) within species. Chews produced the highest  $MPA$  peak in all pasture species ( $P \leq 0.001$ ). Event duration  $D$  was the main and only complementary variable selected to identify type of jaw movement, except for alfalfa, where  $MPA$  was also selected.

#### B. Comparison of each type of jaw movements across plant species

Bites were longest in alfalfa and shortest in oats ( $P \leq 0.001$ ). Chew-bite events were longest ( $P \leq 0.001$ ) in oats and shortest in white clover and alfalfa. There were no significant differences in the  $FSP$  among the pastures considered for any type of jaw movement. All types of jaw movement were significantly different in  $TE$  among plant species. White clover produced the highest  $MPA$  for all jaw movements ( $P \leq 0.001$ ). Discriminant analysis selected  $D$  and  $TE$  as the main complementary variables for models considering all covariates.  $MPA$  was also included in the discrimination of B and  $FSP$  in the discrimination of CB.

#### C. Simultaneous identification of jaw movements and pasture species

Event duration ( $D$ ) was the most important variable in the discrimination of the 12 classes (3 jaw movement types x 4 plant species). Peak amplitude ( $MPA$ ) was also included in the discrimination function.

### III. EXPERIMENT 3

#### A. Comparison of chewing during rumination or grazing within pasture species

Chewing during grazing was significantly shorter ( $P = 0.022$ ) than during rumination for alfalfa (Table A3), but differences were not significant in annual ryegrass ( $P = 0.412$ ). Chewing during rumination in alfalfa produced a peak of energy in a lower  $FSP$  ( $P \leq 0.001$ ) than during grazing, but the difference was not significant in annual ryegrass ( $P = 133$ ).  $TE$  was lowest in annual ryegrass grazing ( $P \leq 0.001$ ), and it was the only complementary variable selected for discrimination from the  $C_V$  group.

#### B. Comparison of types of jaw movements in two pasture species

Bites were the shortest (Table A4), CB were the longest events ( $P \leq 0.001$ ). Bites had power peaks at lower  $FSP$  frequency ( $P = 0.001$ ) than C and CB. Within each species, all jaw movements had similar  $TE$  ( $P = 0.452$ ), but all B, C and CB in alfalfa had higher  $TE$  than in annual ryegrass ( $P \leq 0.001$ ). Chewing events produced the highest  $MPA$  energy in both pasture species

( $P \leq 0.001$ ), and for each type of jaw movement, *MPA* was higher in alfalfa than in annual ryegrass ( $P \leq 0.001$ ). Although it did not improve the classification, *TE* was selected to discriminate CB; for the other types of jaw movements models with *EB* only or *EB* with  $C_V$  achieved the same accuracy.

## Tables

TABLE A1. Test of differences among types of jaw movements and grazing animal species cows and sheep (Experiment 1). *D* is event duration, *FSP* is frequency of peak power, *TE* is total energy and *MPA* is amplitude of peak power. Lack of common letters between any two cells within variables denotes a significant difference between the means (Tukey-Kramer HSD,  $P < 0.05$ ). Values are ranked from highest (a) to lowest (d).

| Variable |       | B | C        | CB       |
|----------|-------|---|----------|----------|
| D(ms)    | Cows  | c | b        | <b>a</b> |
|          | Sheep | c | c        | b        |
| FSP(Hz)  | Cows  | b | bc       | b        |
|          | Sheep | d | <b>a</b> | cd       |
| TE       | Cows  | b | <b>a</b> | b        |
|          | Sheep | c | d        | c        |
| MPA      | Cows  | b | <b>a</b> | b        |
|          | Sheep | b | b        | b        |

TABLE A2. Test of differences among types of jaw movements and forage species (Experiment 2). *D* is event duration, *FSP* is frequency of peak power, *TE* is total energy and *MPA* is amplitude of peak power. Lack of common letters between any two cells within variables denotes a significant difference between the means (Tukey-Kramer HSD,  $P < 0.05$ ). Values are ranked from highest (a) to lowest (d).

| Variable |         | B        | C        | CB       |
|----------|---------|----------|----------|----------|
| D(ms)    | Alfalfa | b        | ef       | c        |
|          | Fescue  | fg       | cd       | b        |
|          | Oats    | g        | de       | <b>a</b> |
|          | Clover  | fg       | gh       | c        |
| FSP(Hz)  | Alfalfa | b        | a        | <b>a</b> |
|          | Fescue  | b        | a        | <b>a</b> |
|          | Oats    | b        | a        | <b>a</b> |
|          | Clover  | b        | a        | <b>a</b> |
| TE       | Alfalfa | b        | b        | b        |
|          | Fescue  | d        | d        | d        |
|          | Oats    | c        | c        | c        |
|          | Clover  | <b>a</b> | <b>a</b> | <b>a</b> |
| MPA      | Alfalfa | e        | ab       | de       |
|          | Fescue  | cde      | bcd      | e        |
|          | Oats    | de       | bcd      | e        |
|          | Clover  | ab       | <b>a</b> | bc       |

TABLE A3. Test of differences between grazing and rumination chews in different pasture species (Experiment 3).  $D$  is event duration,  $FSP$  is frequency of peak power,  $TE$  is total energy and  $MPA$  is amplitude of peak power. Lack of common letters between any two cells within variables denotes a significant difference between the means (Tukey-Kramer HSD,  $P < 0.05$ ). Values are ranked from highest (a) to lowest (d).

| Variable |          | Grazing  | Rumination |
|----------|----------|----------|------------|
| D(ms)    | Alfalfa  | c        | <b>a</b>   |
|          | Ryegrass | bc       | b          |
| FSP(Hz)  | Alfalfa  | <b>a</b> | b          |
|          | Ryegrass | <b>a</b> | <b>a</b>   |
| TE       | Alfalfa  | <b>a</b> | <b>a</b>   |
|          | Ryegrass | b        | <b>a</b>   |
| MPA      | Alfalfa  | <b>a</b> | <b>a</b>   |
|          | Ryegrass | b        | b          |

TABLE A4. Test of differences among types of jaw movements and forage species (Experiment 3).  $D$  is event duration,  $FSP$  is frequency of peak power,  $TE$  is total energy and  $MPA$  is amplitude of peak power. Lack of common letters between any two cells within variables denotes a significant difference between the means (Tukey-Kramer HSD,  $P < 0.05$ ). Values are ranked from highest (a) to lowest (d).

| Variable |          | B        | C        | CB       |
|----------|----------|----------|----------|----------|
| D(ms)    | Alfalfa  | c        | b        | <b>a</b> |
|          | Ryegrass | c        | b        | <b>a</b> |
| FSP(Hz)  | Alfalfa  | c        | b        | ab       |
|          | Ryegrass | c        | b        | ab       |
| TE       | Alfalfa  | <b>a</b> | <b>a</b> | <b>a</b> |
|          | Ryegrass | b        | b        | b        |
| MPA      | Alfalfa  | b        | <b>a</b> | b        |
|          | Ryegrass | c        | b        | c        |
